# Supplementary material for: Genotyping and In Silico Analysis of Delmarva (DMV/1639) Infectious Bronchitis Virus (IBV) Spike 1 (S1) Glycoprotein
Source: MDPI journal article supplement (doi:10.3390/genes13091617), 2022-09-09
Supplement: s1 [file s1]

**Supplementary Table S1.** 85 reference IBV sequences used in phylogenetic analysis based on S1 gene nucleotide sequence.

| Reference sequence    | Accession number | Country     |
|-----------------------|------------------|-------------|
| N1/08                 | JN176213         | Australia   |
| V18/91                | U29521           | Australia   |
| N4/02                 | DQ059618         | Australia   |
| N5/03                 | DQ059619         | Australia   |
| B1648                 | X87238           | Belgium     |
| IBV/Brasil/351/1984   | GU393339         | Brazil      |
| UFMG/1141             | JX182783         | Brazil      |
| Qu_mv                 | AF349621         | Canada      |
| Qu16                  | AF349620         | Canada      |
| IBV/Ck/Can/17-035614  | MN512434         | Canada      |
| IBV/Ck/Can/17-036989  | MN512435         | Canada      |
| IBV/Ck/Can/18-048192T | MN512436         | Canada      |
| IBV/Ck/Can/18-048430  | MN512437         | Canada      |
| IBV/Ck/Can/18-049707  | MN512438         | Canada      |
| 48SD-96VI             | KC577388         | China       |
| QXIBV                 | AF193423         | China       |
| CK/CH/LLN/111169      | KF411040         | China       |
| Connecticut vaccine   | KF696629         | China       |
| QS                    | JQ250818         | China       |
| SDW                   | DQ070840         | China       |
| SDIB781/2012          | KF007209         | China       |
| TC07-2                | GQ265948         | China       |
| ck/CH/LHLJ/110664     | JQ739299         | China       |
| GX2-98                | AY251816         | China       |
| ck/CH/LSD/110857      | JQ739375         | China       |
| 4/91 vaccine          | KF377577         | China       |
| ck/CH/LSD/110712      | JQ739363         | China       |
| CK/CH/LDL/97I         | EF030995         | China       |
| Q1                    | AF286302         | China       |
| Eg/1265B/2012         | KC533682         | Egypt       |
| FR-85131-85           | AJ618985         | France      |
| It/497/02             | DQ901377         | Italy       |
| IZO 28/86             | KJ941019         | Italy       |
| IBV422                | KF809791         | India       |
| V25                   | KF757451         | India       |
| Variant 1             | AF093795         | Israel      |
| IS/1201               | DQ400359         | Israel      |
| Variant 2             | AF093796         | Israel      |
| JP8443                | AY296745         | Japan       |
| K620/02               | FJ807944         | Korea       |
| SNU8067               | JQ977697         | Korea       |
| A                     | AF151953         | New Zealand |

|                     |          |                 |
|---------------------|----------|-----------------|
| D                   | AF151956 | New Zealand     |
| K43                 | AF151958 | New Zealand     |
| H120                | FJ888351 | The Netherlands |
| D274                | X15832   | The Netherlands |
| BL-56               | AF352831 | Mexico          |
| Moroccan-G/83       | EU914938 | Morocco         |
| NGA/N544/2006       | FN182269 | Nigeria         |
| NGA/324/2006        | FN182277 | Nigeria         |
| NGA/295/2006        | FN182276 | Nigeria         |
| NER/28/2007         | FN182272 | Niger           |
| RF/01/02            | AJ441314 | Russia          |
| Spain/00/336        | DQ386098 | Spain           |
| Spain/98/313        | DQ064808 | Spain           |
| TP/64               | AY606320 | Taiwan          |
| UK/L-633/04         | DQ901376 | United Kingdom  |
| UK/7/91             | Z83975   | United Kingdom  |
| 6/82                | X04723   | United Kingdom  |
| Beaudette           | M95169   | USA             |
| M41                 | AY561711 | USA             |
| Conn46 1996         | FJ904716 | USA             |
| Iowa97              | GU393337 | USA             |
| Gray                | L14069   | USA             |
| JMK                 | L14070   | USA             |
| PA/5344/98          | AY789947 | USA             |
| Holte               | L18988   | USA             |
| L905                | JQ964070 | USA             |
| SE17                | M99484   | USA             |
| ArkDPI              | AF006624 | USA             |
| Arkansas Vaccine    | GQ504721 | USA             |
| CAL99               | DQ912831 | USA             |
| PA/Wolgemuth/98     | AF305595 | USA             |
| AL/6609/98          | AF510656 | USA             |
| MDL_DMV1639 15-6636 | KX529720 | USA             |
| MDL DMV1639 15-5582 | KX529725 | USA             |
| CA/1737/04          | EU925393 | USA             |
| DMV/5642/06         | EU694402 | USA             |
| GA/13485/2013       | KP085597 | USA             |
| GA/13384/2013       | KM660635 | USA             |
| GA08                | GU301925 | USA             |
| DE/072/92           | U77298   | USA             |
| GA/13055/00         | AF338719 | USA             |
| CU82792             | AF317214 | USA             |
| GA/19010/19         | MK570452 | USA             |

**Supplementary Table S2.** S1 glycoproteins of IBV/Ck/Can/2558004, Canadian, and US DMV/1639 IBVs utilized in pairwise alignment.

| Reference sequence    | Accession number | aa* | Country | Year of isolation |
|-----------------------|------------------|-----|---------|-------------------|
| IBV/Ck/Can/17-035614  | MN512434         | 536 | Canada  | 2019              |
| IBV/Ck/Can/17-036989  | MN512435         | 536 | Canada  | 2019              |
| IBV/Ck/Can/18-048192T | MN512436         | 536 | Canada  | 2019              |
| IBV/Ck/Can/18-048430  | MN512437         | 536 | Canada  | 2019              |
| IBV/Ck/Can/18-049707  | MN512438         | 536 | Canada  | 2019              |
| MDL_DMV1639_15-6636   | KX529720         | 537 | USA     | 2011              |
| MDL DMV1639_15-5582   | KX529725         | 537 | USA     | 2011              |
| GA/19010/19           | MK570452         | 537 | USA     | 2019              |

aa\*: The number of amino acids in the S1 protein sequence.

**Supplementary Table S3.** Percent S1 amino acid sequence similarity of IBV/Ck/Can/2558004 (bold), 5 Canadian DMV/1639 IBVs (shaded) and 3 US DMV/1639 IBV isolates (non-shaded).

|   |                           | 1      | 2      | 3      | 4      | 5      | 6      | 7      | 8      | 9      |
|---|---------------------------|--------|--------|--------|--------|--------|--------|--------|--------|--------|
| 1 | <b>IBV/Ck/Can/2558004</b> |        | 99.25% | 99.07% | 99.07% | 98.88% | 99.07% | 97.20% | 94.78% | 94.78% |
| 2 | IBV/Ck/Can/17-035614      | 99.25% |        | 99.63% | 99.44% | 99.25% | 99.44% | 97.20% | 95.52% | 95.52% |
| 3 | IBV/Ck/Can/18-048430      | 99.07% | 99.63% |        | 99.63% | 99.07% | 99.25% | 97.20% | 95.15% | 95.15% |
| 4 | IBV/Ck/Can/18-048192T     | 99.07% | 99.44% | 99.63% |        | 99.07% | 99.25% | 97.20% | 94.96% | 94.96% |
| 5 | IBV/Ck/Can/17-036989      | 98.88% | 99.25% | 99.07% | 99.07% |        | 99.81% | 96.83% | 95.15% | 95.15% |
| 6 | IBV/Ck/Can/18-049707      | 99.07% | 99.44% | 99.25% | 99.25% | 99.81% |        | 97.02% | 95.34% | 95.34% |
| 7 | GA/19010/19               | 97.20% | 99.20% | 97.20% | 97.20% | 96.83% | 97.02% |        | 95.53% | 95.53% |
| 8 | MDL_DMV1639_15-5582       | 94.78% | 95.52% | 95.52% | 94.96% | 95.15% | 95.34% | 95.53% |        | 100%   |
| 9 | MDL_DMV1639_15-6636       | 94.78% | 95.52% | 95.52% | 94.96% | 95.15% | 95.34% | 95.53% | 100%   |        |

**Supplementary Table S4.** Prediction of conserved serine (red, underlined), threonine (blue, underlined), and tyrosine (green, underlined) phosphorylation sites in S1 glycoprotein of IBV/Ck/Can/2558004 and MDL\_DMV1639 \_15-5582 (KX529725). The positions are denoted with superscripts.

| Serine phosphorylation sites       | Threonine phosphorylation sites    | Tyrosine phosphorylation sites   |
|------------------------------------|------------------------------------|----------------------------------|
| YYYQ <u>S</u> <sup>32</sup> AFRP   | LLLV <u>T</u> <sup>10</sup> PLFA   | SAVL <u>Y</u> <sup>21</sup> DNNS |
| FRPG <u>S</u> <sup>38</sup> GWHL   | VSEQTSPG <u>T</u> <sup>56</sup>    | HGGAY <sup>47</sup> AVVN         |
| SEQT <u>S</u> <sup>57</sup> PGTC   | SVAM <u>T</u> <sup>80</sup> APLN   | IEQNY <sup>128</sup> IRIA        |
| AIGY <u>S</u> <sup>69</sup> MNFS   | RSNG <u>T</u> <sup>139</sup> GPRD  | NETLY <sup>185</sup> VSGA        |
| AWSG <u>S</u> <sup>91</sup> QFCT   | FYN <u>S</u> <sup>149</sup> VSVS   | AQSGY <sup>306</sup> YNFN        |
| LFYN <u>S</u> <sup>148</sup> TVSV  | DLVFTSNE <u>T</u> <sup>179</sup>   | SDFMY <sup>326</sup> GSYH        |
| NSTV <u>S</u> <sup>151</sup> VSKY  | <u>T</u> <sup>183</sup> SNETLYVS   | ISLAY <sup>355</sup> GPLQ        |
| TVSV <u>S</u> <sup>153</sup> KYPK  | GVDF <u>T</u> <sup>194</sup> AGGP  | CCYAY <sup>377</sup> SYNG        |
| PFTN <u>S</u> <sup>251</sup> SLVK  | GGPI <u>T</u> <sup>200</sup> YKVM  | KCVDY <sup>438</sup> NIYG        |
| YREN <u>S</u> <sup>265</sup> VNTT  | LCDG <u>T</u> <sup>227</sup> PRGL  | DYNIY <sup>441</sup> GRVG        |
| VTAAQ <u>S</u> <sup>304</sup> GYYN | QTYQ <u>T</u> <sup>299</sup> VTAAQ | ENQFY <sup>529</sup> IKLT        |
| VYKA <u>S</u> <sup>322</sup> DFMY  | SRIQ <u>T</u> <sup>415</sup> TTKP  |                                  |
| FMYG <u>S</u> <sup>328</sup> YHPK  | RIQT <u>T</u> <sup>416</sup> TKPH  |                                  |
| LWFN <u>S</u> <sup>348</sup> LSIS  | IQTT <u>T</u> <sup>417</sup> KPHV  |                                  |
| FNSL <u>S</u> <sup>350</sup> ISLA  | PHVL <u>T</u> <sup>423</sup> THFY  |                                  |
| GCKQ <u>S</u> <sup>365</sup> VFNG  | HVL <u>T</u> <sup>424</sup> HFYN   |                                  |
| CYAY <u>S</u> <sup>378</sup> YNGP  | QGF <u>T</u> <sup>450</sup> NVTD   |                                  |
| KSDG <u>S</u> <sup>411</sup> RIQT  | VGIL <u>T</u> <sup>514</sup> SRNV  |                                  |
| NVTD <u>S</u> <sup>455</sup> TADY  |                                    |                                  |
| GILT <u>S</u> <sup>515</sup> RNVT  |                                    |                                  |
| NVTG <u>S</u> <sup>521</sup> QFLE  |                                    |                                  |

**Supplementary Table S5.** Prediction of potential palmitoylation sites (red color) in S1 glycoprotein of IBV/Ck/Can/2558004 and MDL\_DMV1639\_15-5582 (KX529725).

| Peptide            | Position | Score  | Cut-off | Cluster   |
|--------------------|----------|--------|---------|-----------|
| VTLLFALCSAVLYDN    | 16       | 29     | 0       | Cluster C |
| AQTSPGSC TAGAIGY   | 61       | 7.572  | 0       | Cluster A |
| SWSDSQFCTAHCNFT    | 94       | 1.754  | 0       | Cluster B |
| SQFCTAHCNFTNIVV    | 98       | 6.645  | 0       | Cluster A |
| IVVFVTHCFKRGQHF    | 110      | 2.012  | 0       | Cluster C |
| FKRGQHF C PLTGFI E | 118      | 4.514  | 0       | Cluster A |
| PKFRSLQCVNNQTSV    | 163      | 3.797  | 0       | Cluster A |
| TAHDVILCDGTPRGL    | 224      | 12.797 | 0       | Cluster A |
| TPRGLLACQYNTGNF    | 234      | 1.996  | 0       | Cluster C |
| YGSYHPKCNFRPETL    | 333      | 2.408  | 0       | Cluster C |
| YGPLQGGCKQSVFNN    | 362      | 2.126  | 0       | Cluster C |
| VFNNRATCCYAYSYN    | 373      | 7.359  | 0       | Cluster B |
| FNNRATCCYAYSNG     | 374      | 2.757  | 0       | Cluster C |
| SYNGPRACKGVYRGQ    | 385      | 1.429  | 0       | Cluster C |
| QLQQLFECGLLVYIT    | 399      | 4.314  | 0       | Cluster A |
| NNITLDKCVDYNIYG    | 435      | 4.584  | 0       | Cluster A |
| NFYKVNPCEDVNQQF    | 495      | 1.243  | 0       | Cluster C |
